19 **Abstract**

20 IRONMAN is a family of small peptides which positively regulate the Fe  
21 deficiency response. However, the molecular mechanism by which OsIMA1  
22 and OsIMA2 regulate Fe homeostasis was unclear. Here, we reveal that  
23 OsIMA1 and OsIMA2 interact with the potential Fe sensors, OsHRZ1 and  
24 OsHRZ2. OsIMA1 and OsIMA2 contain a conserved 17-amino acid C-terminal  
25 region which is responsible for the interactions with OsHRZ1 and OsHRZ2.  
26 The *OsIMA1* overexpressing plants have the increased seed Fe concentration  
27 and the reduced fertility, as observed in the *hrz1-2* loss-of-function mutant  
28 plants. Moreover, the expression trends of Fe deficiency inducible genes in the  
29 *OsIMA1* overexpressing plants are the same to those in the *hrz1-2*.  
30 Co-expression assays suggest that OsHRZ1 and OsHRZ2 promote the  
31 degradation of OsIMA1 proteins. As the interaction partners of OsHRZ1, the  
32 OsPRI proteins also interact with OsHRZ2. The conserved C-terminal region of  
33 four OsPRIs contributes to the interactions with OsHRZ1 and OsHRZ2. An  
34 artificial IMA (aIMA) derived from the C-terminal of OsPRI1 can be also  
35 degraded by OsHRZ1. Moreover, the *aIMA* overexpressing rice plants  
36 accumulate more Fe without reduction of fertility. This work establishes the link  
37 between OsIMAs and OsHRZs, and develops a new strategy for Fe  
38 fortification in rice.

39

## 40 **Introduction**

41 Iron (Fe) is one of the essential micronutrients for all living organisms since Fe  
42 can mediate the redox reactions in the electron transport chain through the  
43 conversion between ferrous and ferric, which takes part in various cellular  
44 biochemical processes (Hänsch and Mendel, 2009). Fe deficiency is one of the  
45 most prevalent nutritional disorders worldwide (Mayer *et al.*, 2008). Since  
46 humans obtain Fe mainly from plants, the production of Fe-rich crops will profit  
47 human health. Fe deficiency often results in interveinal chlorosis of leaves,  
48 growth retardation and reduced crop yields (Briat *et al.*, 2015). Despite Fe is  
49 abundant in the earth's crust, bioavailability of Fe is low as it is mainly present  
50 in the forms of insoluble hydroxides and oxides, especially in calcareous soils.  
51 One third of world's cultivated lands are calcareous soils. Thus, Fe deficiency  
52 has become one of the factors limiting plant quality and productivity around the  
53 world.

54 To cope with Fe deficiency stress, plants have evolved two distinct strategies  
55 for efficient Fe uptake, the reduction strategy (strategy I) and the chelation  
56 strategy (strategy II) (Römheld and Marschner, 1986). Generally, the strategy I,  
57 which is mainly utilized in non-graminaceous plants, involves the acidification  
58 of the rhizosphere to release Fe, the reduction of Fe (III) to Fe (II) and the  
59 transport of Fe (II) (Marschner, 1995; Eide *et al.*, 1996; Robinson *et al.*, 1999).  
60 The strategy II, which is employed by graminaceous plants, is mediated by the  
61 synthesis and secretion of Fe (III) chelators, the mugineic acid (MA) family, and  
62 the translocation of MA-Fe (III) into roots. Rice (*Oryza sativa*) is a specific  
63 graminaceous species, which preferentially grows in the waterlogged field.  
64 Rice not only possesses the strategy II-based Fe-uptake system which  
65 includes the MA synthesis associated enzymes (*e. g.* OsNAS1, OsNAS2,  
66 OsNAAT1, OsDMAS1, *etc.*), the MA excretion protein (*e. g.* OsTOM1) and the  
67 MA-Fe (III) transporter (*e. g.* OsYSL15), but also partial strategy I Fe uptake  
68 system which involves the Fe (II) transporter OsIRT1 and OsIRT2 (Ishimaru *et*  
69 *al.*, 2006; Cheng *et al.*, 2007).

70 Fe deficiency directly restricts the growth and development of plants, while  
71 excessive iron causes the formation of cytotoxic reactive oxygen species (ROS)  
72 and damages cellular constituents (Brumbarova *et al.*, 2005). To maintain Fe  
73 homeostasis, plants have developed the sophisticated signaling network to  
74 regulate Fe uptake and transport. The basic helix-loop-helix (bHLH) family  
75 plays a key role in the maintenance of Fe homeostasis in rice (Kobayashi,  
76 2019). OsIRO2 (Iron-Related bHLH Transcription Factor 2, OsbHLH56)  
77 functions as a crucial regulator of Fe homeostasis (Ogo *et al.*, 2007), which is  
78 in charge of the expression of strategy II associated genes *OsNAS1*, *OsNAS2*,  
79 *OsNAAT1*, *OsTOM1* and *OsYSL15* (Ogo *et al.*, 2011; Liang *et al.*, 2020).  
80 OsFIT (FER LIKE FE DEFICIENCY INDUCED TRANSCRIPTION  
81 FACTOR)/OsbHLH156 is an interaction partner of OsIRO2. Unlike OsIRO2  
82 which is preferentially localized in the cytoplasm, OsFIT mainly localizes in the  
83 nucleus. In the presence of OsFIT, OsIRO2 moves to the nucleus where OsFIT  
84 and OsIRO2 form a transcription complex to activate the expression of  
85 Fe-uptake gene (Wang *et al.*, 2019; Liang *et al.*, 2020). The transcription of  
86 *OsFIT* and *OsIRO2* increases under Fe deficient conditions, but decreases  
87 under Fe sufficient conditions. OsIRO3 is a negative regulator of Fe  
88 homeostasis (Zheng *et al.*, 2010; Wang *et al.*, 2020a; Wang *et al.*, 2020b), and  
89 the loss-of-function of *OsIRO3* causes the up-regulation of *OsFIT* and *OsIRO2*  
90 (Li *et al.*, 2022). In contrast, OsPRI1 (Positive Regulator of Iron Homeostasis  
91 1)/OsbHLH060, OsPRI2/bHLH058, and OsPRI3/OsbHLH059 positively  
92 regulate the expression of *OsIRO2* and *OsFIT* (Zhang *et al.*, 2017, 2020;  
93 Kobayashi *et al.*, 2019). OsHRZ1 (Haemerythrin Motif-Containing Really  
94 Interesting New Gene (RING) and Zinc-Finger Protein 1) and OsHRZ2 have  
95 been identified as potential Fe sensors playing a negative role in Fe  
96 homeostasis, which contain several hemerythrin domains for Fe binding and a  
97 RING domain for E3 ligase activity (Kobayashi *et al.*, 2013). OsHRZ1 interacts  
98 with OsPRI1, OsPRI2, and OsPRI3 and mediates their degradation via the  
99 26S proteasome pathway (Zhang *et al.*, 2017, 2020).

100 IMA (IRONMAN), a family of small peptides, has been recently reported to  
101 play a positive role in the Fe deficiency response in *Arabidopsis* and rice  
102 (Hirayama *et al.*, 2018; Grillet *et al.*, 2018; Kobayashi *et al.*, 2021; Li *et al.*,  
103 2021). Two OsIMA genes were identified in rice (Grillet *et al.*, 2018; Kobayashi  
104 *et al.*, 2021). The expression of both genes is positively regulated by OsPRI2  
105 and OsPRI3, and negatively regulated by OsIRO3 (Wang *et al.*, 2020).  
106 However, it was still unclear how OsIMA1 and OsIMA1 activate the Fe  
107 deficiency response in rice. In the present study, we show that OsIMA1 and  
108 OsIMA2 physically interact with OsHRZ1 and OsHRZ2, and their protein  
109 stability is under the control of OsHRZs. Correspondingly, the *OsIMA1*  
110 overexpression causes the phenotypes similar to those of *hrz1-2* mutant plants.  
111 Furthermore, the overexpression of an artificial IMA derived from OsPRI1  
112 promotes Fe accumulation in seeds, but does not lower fertility.

113

114

115

116

117 **Results**

118 **OsIMA1 and OsIMA2 interact with OsHRZ1 and OsHRZ2**

119 OsIMA1 and OsIMA2 play positive roles in Fe homeostasis since their  
120 overexpression promotes the expression of Fe deficiency inducible genes  
121 (Kobayashi *et al.*, 2021). It was reported that Arabidopsis IMAs physically  
122 interact with the C-terminal region of BTS (Li *et al.*, 2021) which is an ortholog  
123 of OsHRZ1 (Kobayashi *et al.*, 2013). OsHRZ2 is a paralog of OsHRZ1 in rice.  
124 To verify whether OsIMA1 and OsIMA2 interact with OsHRZ1 and OsHRZ2,  
125 we carried out yeast-two-hybrid assays. OsIMA1 and OsIMA2 were fused with  
126 the GAL4 DNA binding domain (BD) in the pGBKT7 vector as the baits, and  
127 the C-terminal regions of OsHRZ1 and OsHRZ2 with the GAL4 activation  
128 domain (AD) in the pGADT7 vector as the preys. As shown in the growth of  
129 yeast, both OsIMA1 and OsIMA2 interact with the C-terminal regions of  
130 OsHRZ1 and OsHRZ2 (Figure 1A).

131 OsHRZ1 protein localizes in the nucleus, and OsHRZ2 in both the nucleus  
132 and cytoplasm (Kobayashi *et al.*, 2013). To investigate the subcellular  
133 localization of OsIMA1 and OsIMA2, mCherry was tagged to the N-end of  
134 OsIMA1 and OsIMA2 respectively and expressed in tobacco leaves. As shown  
135 in Figure 1B, both OsIMA1 and OsIMA2 were present in the nucleus and  
136 cytoplasm. To further confirm the location where the protein interactions occur,  
137 we employed the tripartite split-GFP system monitoring the localization of  
138 protein complex. The GFP10 fragment was fused with OsIMA proteins in their  
139 N-end (GFP10-OsIMAs) and the GFP11 with OsHRZs in their C-end  
140 (OsHRZs-GFP11). When GFP10-OsIMA1/2 and OsHRZ1-GFP11 were  
141 transiently co-expressed with GFP1-9 in tobacco leaves, the GFP signal was  
142 only visible in the nucleus of transformed cells (Figure 1C). By contrast, when  
143 GFP10-OsIMA1/2 and OsHRZ2-GFP11 were transiently co-expressed with  
144 GFP1-9, the GFP signal was visible in both the nucleus and cytoplasm. Taken  
145 together, our data suggest that OsIMAs physically interact with OsHRZs in  
146 plant cells.

147

148 **The C-terminal region of OsIMAs accounts for the interactions with**  
149 **OsHRZ1 and OsHRZ2**

150 The IMAs feature a conserved C-terminal region (Figure 2A; Grillet *et al.*,  
151 2018). We wanted to know whether the C-terminal region is responsible for  
152 their interactions with OsHRZs. We performed yeast-two-hybrid assays.  
153 OsIMA peptides were divided into two parts, the N-terminal region and the  
154 C-terminal 17-amino acid region, and respectively fused to the BD in the  
155 pGBK-T7 vector as baits. Yeast growth assays indicated that their C-terminal  
156 regions, but not the N-terminal regions, interact with OsHRZs (Figure 2B).

157 The last amino acid A of Arabidopsis IMAs is crucial for their interactions with  
158 BTS (Li *et al.*, 2021). The last amino acid of OsIMAs is also A. We asked  
159 whether the same case occurs in rice. We generated the full-length OsIMAs  
160 with their last amino acid changed from A to V, and fused them with the BD as  
161 baits. Yeast growth indicated that the mutation of last amino acid A disrupted  
162 the interactions between OsIMAs and OsHRZs (Figure 2B). These data  
163 suggest that the C-terminal regions of OsIMAs contribute to their interactions  
164 with OsHRZs, and the last amino acid A is necessary.

165

166 ***OsIMA1* overexpressing plants mimic the *hrz1-2* mutant plants**

167 To further investigate how OsIMAs regulate the Fe deficiency response, we  
168 generated *OsIMA1* overexpressing transgenic plants in which the *OsIMA1*  
169 gene was driven by the maize ubiquitin promoter (Figure S1). The *OsIMA1*  
170 transgenic plants displayed the reduced fertility, which is also observed in the  
171 *hrz1-2* loss-of-function mutant plants (Figure 3A). Measurement of Fe  
172 concentration indicated that the *OsIMA1* overexpressing plants accumulated  
173 much more Fe in the seeds than the wild type plants, as did the *hrz1-2* mutant  
174 plants (Figure 3B). Considering that the *OsIMA1* overexpressing plants  
175 phenocopied the *hrz1-1* mutant plants, we then compared the expression of  
176 several Fe deficiency inducible genes. In the Fe deficiency response signaling

177 pathway, *OsIRO3* and *OsIRO2* are two major transcription factors which are  
178 considerably up-regulated under Fe deficient conditions. Additionally, the  
179 strategy II associated genes, such *OsNAS1*, *OsNAS2*, *OsTOM1* and *OsYSL15*,  
180 are strongly induced by Fe deficiency. Rice plants were grown in Fe sufficient  
181 solution for two weeks, and then their roots were separated and used for RNA  
182 extraction. Examination of transcript abundance indicated that the expression  
183 of those Fe deficiency inducible genes was up-regulated significantly in both  
184 the *OsIMA1* overexpressing plants and *hrz1-2* mutant plants compared with  
185 the wild type plants (Figure 3C).

186

### 187 **OsHRZ1 and OsHRZ2 promote the degradation of OsIMAs**

188 OsHRZ1 and OsHRZ2 have a RING domain which possesses E3 ligase  
189 activity and several proteins have been reported to be degraded by OsHRZ1  
190 and OsHRZ2 (Zhang *et al.*, 2017, 2020; Guo *et al.*, 2022). To investigate  
191 whether OsHRZ1 and OsHRZ2 also facilitate the degradation of OsIMAs, we  
192 used *OsIMA1* as a representative and carried out the transient expression  
193 assays in tobacco leaves. The C-end of OsHRZ1 and OsHRZ2 was fused with  
194 the GFP tag. mCherry-*OsIMA1* was co-expressed with GFP, OsHRZ1-GFP,  
195 and OsHRZ2-GFP respectively in tobacco leaves. Immunoblot analysis  
196 indicated that the protein levels of mCherry-*OsIMA1* were significantly lower in  
197 the presence of OsHRZ1-GFP or OsHRZ2-GFP compared with in the  
198 presence of GFP (Figure 4). These data suggest that OsHRZ1 and OsHRZ2  
199 accelerate the degradation of *OsIMA1* and *OsIMA2*.

200 Given that the last amino acid of *OsIMA1* and *OsIMA2* is responsible for  
201 their interactions with OsHRZ1 and OsHRZ2, we speculated that the protein  
202 stability of *OsIMA1*<sup>A54V</sup> would not be affected by OsHRZ1 and OsHRZ2. The  
203 mCherry tag was linked with the N-end of *OsIMA1*<sup>A54V</sup>, and then used for  
204 co-expression assays. As expected, OsHRZ1 and OsHRZ2 could not degrade  
205 *OsIMA1*<sup>A54V</sup> (Figure 4). These data suggest that OsHRZ1 and OsHRZ2  
206 degrade OsIMAs in a protein interaction dependent manner.



207

### 208 **The C-terminal region of OsPRI1 interacts with OsHRZ1 and OsHRZ2**

209 The rice bHLH IVc subgroup consists of four members, and three of them  
210 (OsPRI1, OsPRI2, and OsPRI3) interact with OsHRZ1 (Zhang *et al.*, 2017,  
211 2020). To verify if the fourth member OsPRI4 also interacts with OsHRZ1, we  
212 tested their interaction using the yeast-two-hybrid system. Yeast growth  
213 indicated that OsPRI4 and OsHRZ1 interact with each other. Due to OsHRZ2  
214 is a paralog of OsHRZ1, we wanted to know if OsHRZ2 is also an interaction  
215 partner of these four OsPRI proteins. Protein interaction tests indicated that  
216 these four OsPRI proteins also interact with OsHRZ2 (Figure 5A).

217 The alignment of four OsPRI proteins shows that they share a conserved  
218 C-terminal region (Figure 5B). We then asked whether their interactions with  
219 OsHRZ1 and OsHRZ2 depend on their C-terminal regions. Considering the  
220 high similarity of their C-terminal regions of bHLH IVc proteins across different  
221 plant species (Figure 5B), OsPRI1 was chosen as a representative for further  
222 analysis. OsPRI1 was divided into three parts, the N-terminal (OsPRI1n), the  
223 bHLH domain (OsPRI1m), and the C-terminal (OsPRI1c), and fused with the  
224 AD. OsHRZ1c and OsHRZ2c were fused with the BD. Interaction tests  
225 indicated that only OsPRI1c could interact with OsHRZ1c and OsHRZ2c  
226 (Figure 5C). To further investigate whether the last amino acid A of OsPRI1 is  
227 crucial for the interactions, the A was substituted for V in the full length of  
228 OsPRI1. The results demonstrated that the substitution disrupted the  
229 interaction with OsHRZ1c and OsHRZ2c. These data suggest that the  
230 C-terminal region of OsPRIs is required for the interactions with OsHRZ1 and  
231 OsHRZ2.

232

### 233 **Generation of Fe-fortified rice grains by manipulating an artificial IMA** 234 **derived from OsPRI1**

235 The overexpression of *Os/IMA1* caused the Fe over-accumulation in grains, but  
236 the reduced fertility. Because the reduction of fertility is a disadvantageous

237 factor for yield, we attempted to develop an artificial IMA which would increase  
238 seed Fe concentration but not reduce fertility. Given the functional similarities  
239 between OsIMAs and the C-terminal regions of OsPRIs, the C-terminal region  
240 of OsPRI1 was designed as an artificial IMA (aIMA) (Figure S2A). Having  
241 confirmed that aIMA interacting with OsHRZ1 and OsHRZ2 (Figure 5C), we  
242 wondered whether aIMA could be degraded by OsHRZ1 and OsHRZ2. The  
243 mCherry tag was fused to the N-end of aIMA and used for transient  
244 co-expression assays in tobacco leaves. Compared with the GFP, both  
245 OsHRZ1-GFP and OsHRZ2-GFP caused the damage to mCherry-aIMA  
246 proteins, suggesting that OsHRZ1 and OsHRZ2 favor the degradation of aIMA  
247 (Figure 6A). To further investigate whether aIMA can increase Fe accumulation  
248 in seeds, we generated transgenic rice overexpressing aIMA (Figure S2B, C).  
249 We did not observe visible fertility difference between the wild type and *aIMA*  
250 overexpressing plants (Figure S2D). Then, we determined the Fe  
251 concentration of brown seeds, finding that the Fe concentration was around  
252 two-fold higher in the *aIMA* overexpressing plants than in the wild type (Figure  
253 6B). Taken together, our data suggest that the artificial IMA strategy is effective  
254 on improving Fe concentration of rice grains.

255

256

257

## 258 **Discussion**

259 Recently, great progress has been made in the Fe deficiency response  
260 signaling pathway in rice. Many transcription factors, especially bHLH proteins,  
261 play key roles in the Fe signaling transduction (Kobayashi, 2019). OsHRZ1  
262 and OsHRZ2 are two potential Fe sensors which negatively regulate Fe  
263 homeostasis (Kobayashi *et al.*, 2013). IMAs are a class of small peptides  
264 which are conserved across angiosperms (Grillet *et al.*, 2018). Two OsIMAs  
265 exist in rice, and their overexpression causes the constitutive activation of Fe  
266 deficiency inducible genes (Kobayashi *et al.*, 2021). However, the underlying  
267 molecular mechanism by which OsIMA1 and OsIMA2 mediate Fe signaling  
268 remains to be clarified. Here, we suggest that OsIMAs and OsHRZs regulate  
269 antagonistically the Fe deficiency response. Based on the regulatory  
270 mechanism of OsIMAs, we developed a strategy for generation of Fe fortified  
271 rice by manipulating an artificial IMA peptides.

272 OsHRZ1 and OsHRZ2 contain 1-3 haemerythrin domains and one RING  
273 domain which endow them the Fe binding ability and E3 ligase activity,  
274 respectively (Kobayashi *et al.*, 2013). Here, we revealed that OsHRZ1 and  
275 OsHRZ2 interact with OsIMAs and accelerate the degradation of OsIMAs.  
276 Recently, it was reported that OsHRZ1 interacts with and mediates the  
277 degradation of three bHLH IVc proteins, OsPRI1, OsPRI2, and OsPRI3 (Zhang  
278 *et al.*, 2017, 2020). We further confirmed that all four bHLH IVc members  
279 interact with both OsHRZ1 and OsHRZ2 (Figure 5A). Given that both OsHRZ1  
280 and OsHRZ2 have E3 ligase activity and degrade their substrates (Kobayashi  
281 *et al.*, 2013; Zhang *et al.*, 2017; Guo *et al.*, 2022), it is very likely that OsHRZ2  
282 also mediates the degradation of bHLH IVc proteins. Although bHLH IVc  
283 proteins are the positive regulators of the Fe deficiency response, their  
284 transcription is barely induced by Fe deficiency (Zhang *et al.*, 2017, 2020;  
285 Kobayashi *et al.*, 2019). Thus, it is expected that their protein levels increase in  
286 response to Fe deficiency. It is noteworthy that the transcript abundance of  
287 *OsHRZ1* is also increased under Fe deficient conditions. In order to maintain

288 stable levels of bHLH IVc proteins, the protein stability or activity of OsHRZ1  
289 must be reduced under Fe deficient conditions. Although OsHRZ1 and  
290 OsHRZ2 can bind Fe ions, their protein stability seems not to respond to Fe  
291 status according to the cell free degradation assays in vitro (Kobayashi *et al.*,  
292 2013). A latest study found that OsHRZ2 protein increases in response to Fe  
293 deficiency as shown in the *OsHRZ2-GFP* overexpressing transgenic plants  
294 (Guo *et al.*, 2022). BTS is a homolog of OsHRZ1 in Arabidopsis, and its protein  
295 stability is enhanced in the absence of Fe as shown in the protein translation in  
296 wheat germ extract (Selote *et al.*, 2015). Thus, the protein stability of OsHRZ1  
297 and OsHRZ2 is either irrespective to Fe status or increased under Fe  
298 deficiency conditions. It was an open question how rice plants promote the  
299 accumulation of bHLH IVc proteins to activate the Fe deficiency response. In  
300 Arabidopsis, IMAs interfere with the interactions between bHLH IVc members  
301 and BTS since IMAs and bHLH IVc share a similar C-terminal region which  
302 contributes to the interactions with BTS (Li *et al.*, 2021). We indicated that the  
303 C-terminal regions of both OsIMAs and OsPRIs contain an OsHRZs interacting  
304 domain, which makes it possible that OsIMAs compete with OsPRIs for  
305 interacting with OsHRZs. This hypothesis is further supported by the fact that  
306 the *OsIMA1* overexpressing plants phenocopy the *hrz1-2* mutant plants  
307 (Figure 3). Thus, it is very likely that OsIMAs interfere with the interactions  
308 between OsPRIs and OsHRZs, hence stabilizing the OsPRI proteins and  
309 activating the Fe deficiency response.

310 The reciprocal regulation between OsIMAs and OsHRZs is crucial for the  
311 maintenance of Fe homeostasis. Under Fe deficient conditions, the  
312 transcription of both OsIMAs and OsHRZs is enhanced (Kobayashi *et al.*, 2013,  
313 2021). We show that OsHRZ1 and OsHRZ2 facilitate the degradation of  
314 OsIMA1 (Figure 4). On the other hand, *OsIMA1* overexpression enhances the  
315 transcription of *OsHRZ1*, and the RNA interference of *OsHRZs* promotes the  
316 transcription of *OsIMA1* and *OsIMA2* (Kobayashi *et al.*, 2021). No matter the  
317 overexpression of *OsIMA1* or the loss-of-function of *OsHRZ1*, both cause the

318 Fe over-accumulation and the reduced fertility in rice (Figure 3A). The  
319 disruption of balance between OsIMA1 and OsHRZ1 results in the disorder of  
320 Fe homeostasis and the Fe toxicity. The transcript abundance of *OsIMAs* is  
321 relatively low under Fe sufficient conditions, but extremely high under Fe  
322 deficient conditions (Kobayashi *et al.*, 2021). When *OsIMA1* was  
323 overexpressed under Fe sufficient conditions, rice plants accumulated  
324 excessive Fe (Figure 3B; Kobayashi *et al.*, 2021). Therefore, appropriate  
325 OsIMA levels are required for the maintenance of Fe homeostasis. In addition  
326 to degradation by OsHRZs, the transcription of *OsIMAs* is positively regulated  
327 by OsPRIs (Kobayashi *et al.*, 2021). The balance between the positive  
328 regulators (OsPRIs) and the negative regulators (OsHRZs) maintains the  
329 appropriate levels of OsIMAs.

330 Fe-deficiency anemia is one of the most prevalent human micronutrient  
331 deficiencies around the world. Breeding staple crops with abundant Fe is an  
332 ideal way to cope with Fe deficiency anemia. Fe fortification in rice grains has  
333 been accomplished by introducing Fe-homeostasis associated genes (Masuda  
334 *et al.*, 2013). In the *OsIMA1* overexpressing plants, the expression of Fe  
335 uptake associated genes shows marked enhancement irrespective of Fe  
336 status, which explains the increased Fe accumulation in grains when plants  
337 are grown in Fe sufficient soil. It was reported that the Fe over-accumulation is  
338 related with the embryo lethality of various *bts* mutants (Selote *et al.*, 2015). In  
339 contrast to the complete infertility of *bts* null mutants, the other weak *bts*  
340 mutants with reduced induction of *BTS* have slight embryo lethality. Although  
341 the increased Fe accumulation is advantageous for Fe fortification, the  
342 reduced fertility is disadvantageous for rice yield. The inhibitory effect of  
343 OsIMAs on OsHRZ1 provides an alternative approach to increasing Fe  
344 accumulation without reducing yield. We developed an artificial small peptide,  
345 aIMA, which possesses the ability to interact with OsHRZs and can be  
346 degraded by OsHRZs. Indeed, the increased Fe accumulation and normal  
347 fertility were achieved in the transgenic plants overexpressing aIMA peptides

348 (Figure 6). Unlike the strong increase of Fe concentration in the *OsIMAox*  
349 plants, the moderate Fe increase was detected in the *aIMAox* plants. The  
350 major difference between OsIMAs and aMIA is that OsIMA are rich in aspartic  
351 acid. Grillet *et al.* (2018) revealed that the aspartic acid stretch contributes to  
352 the affinity of IMAs for Fe ions. Since the stability of haemerythrin domain  
353 containing proteins is affected when Fe ions are present (Salahudeen *et al.*,  
354 2009; Vashisht *et al.*, 2009; Selote *et al.*, 2015), it is plausible that OsIMAs  
355 deliver Fe ions to OsHRZs and then result in the inactivity of OsHRZs. It might  
356 be the reason why OsIMA1 has stronger activation to Fe deficiency inducible  
357 genes than aIMA. This also raises the possibility of further improving Fe  
358 accumulation by optimizing the amino acids of aIMA. We noted that the bHLH  
359 IVc proteins share the conserved C-terminal region across different plant  
360 species (Figure 5B). Thus, the artificial IMA strategy can apply to other plant  
361 species beyond rice. Our exploration of an artificial IMA peptide provides a new  
362 strategy for Fe fortification in crops.  
363

364 **Materials and methods**

365 **Plant materials and growth conditions**

366 Rice (*Oryza sativa* L. cv. Nipponbare) was used in this study. Rice plants were  
367 grown in Crops Conservation and Breeding Base of XTBG, in Mengla county  
368 of Yunnan province. For hydroponic culture assays, half-strength Murashige  
369 and Skoog (MS) media (pH5.6-5.8) with 0.1 mM EDTA-Fe (III). The nutrient  
370 solution was exchanged every 3 d. Plants were grown in a growth chamber at  
371 28°C during the day and at 20°C during the night.

372

373 **qRT-PCR**

374 Total RNA was extracted from rice roots or shoots. RNA samples were reverse  
375 transcribed using an RT Primer Mix (oligo dT) and PrimeScript RT Enzyme Mix  
376 for qPCR (TaKaRa, Japan) following the manufacturer's protocol. qRT-PCR  
377 was performed on a Light-Cycler 480 real-time PCR machine (Roche,  
378 Switzerland) by using PrimeScript™ RT reagent (Perfect Real Time) Kit  
379 (TaKaRa, Japan). All PCR amplifications were performed in triplicate, with the  
380 *OsACTIN1* and *OsOBP* as the internal controls to normalize the samples.  
381 Primer sequences used for qRT-PCR are listed in Supplemental Table S1.

382

383 **Metal concentration measurement**

384 Seeds were dried at 65°C for one week. About 500 mg dry weight of them  
385 were digested with 5 ml of 11 M HNO<sub>3</sub> for 3 h at 185°C and 2 ml of 12 M HClO<sub>4</sub>  
386 for 30 min at 220°C. The concentration of Fe was measured with an Inductively  
387 Coupled Plasma Mass Spectrometry (ICP-MS, Japan). Three biological  
388 replicates were performed for analysis.

389

390 **Yeast two-hybrid assays**

391 The yeast two-hybrid assays were carried out according to the manufacturer's  
392 protocol. The C-terminal regions of OsHRZ1 and OsHRZ2 were respectively  
393 cloned into the pGADT7 or pGBKT7 plasmids. The full-length or truncated

394 OsIMAs were respectively cloned into pGBKT7 plasmid. The GAD-PRIs  
395 vectors were described previously (Zhang *et al.*, 2020). Vectors were  
396 transformed into yeast strain Y2HGold (Clontech, Japan). Yeast transformation  
397 was performed according to the Yeastmaker Yeast Transformation System 2  
398 User Manual (Clontech, Japan). The primers used are listed in Supplemental  
399 Table S1.

400

#### 401 **Generation of transgenic plants**

402 For generation of the *OsIMA1* overexpression construct, the full-length CDS of  
403 OsIMA1 was cloned downstream of maize ubiquitin promoter in the pUN1301  
404 binary vector. For generation of the *aIMA* overexpression construct, the  
405 C-terminal region of OsPRI1 was cloned downstream of maize ubiquitin  
406 promoter in the pUN1301 binary vector. The constructs were introduced into  
407 the *Agrobacterium tumefaciens* strain EHA105 and then used for rice  
408 transformation. The transgenic plants with hygromycin were selected and used  
409 for examination of transgene levels. T3 transgenic plants were used for  
410 analysis.

411

#### 412 **Tripartite split-GFP complementation assays**

413 Tripartite split-GFP complementation assays were conducted as previously  
414 reported (Liang *et al.*, 2020). Briefly, the full-length OsIMAs were respectively  
415 cloned into pTG-GFP10, and the full-length OsHRZs to pTG-GFP11. *A.*  
416 *tumefaciens* strain EHA105 was used in the transient expression experiments.  
417 The various combinations of agrobacterial cells were infiltrated into 3-week-old  
418 *Nicotiana benthamiana* leaves by an infiltration buffer (0.2 mM acetosyringone,  
419 10 mM MgCl<sub>2</sub>, and 10 mM MES, pH 5.6). The abaxial sides of leaves were  
420 injected with 20 μM β-estradiol 24 h before observation. GFP fluorescence was  
421 photographed on an OLYMPUS confocal microscope.

422

#### 423 **Degradation assays**



424 OsHRZ1 and OsHRZ2 were fused with the C-end of GFP, and driven by the  
425 CaMV 35S promoter. OsIMA1, OsIMA2, and OsIMA1<sup>A54V</sup> were fused with the  
426 N-terminal of mCherry, and driven by the CaMV 35S promoter. The  
427 combinations indicated were infiltrated into *N. benthamiana* leaves, and kept in  
428 the dark for 48 h. Then, the infiltrated leaves were used for protein extraction  
429 by RIPA buffer (50 mM Tris, 150 mM NaCl, 1% NP-40, 0.5% Sodium  
430 deoxycholate, 0.1% SDS, 1 mM PMSF, 1 x protease inhibitor cocktail [pH 8.0])  
431 and immunoblot was conducted.

432

### 433 **Immunoblotting**

434 Protein was loaded on a 12% SDS-PAGE and transferred to nitrocellulose  
435 membranes. Target proteins on the membrane were detected using  
436 immunodetection and chemiluminescence. Signals on the membrane were  
437 recorded using a chemiluminescence detection machine (Tanon-5200). The  
438 antibodies used for western blot are as follows, mouse monoclonal anti-GFP  
439 (Abmart), anti-mCherry (Abmart) and goat anti-rabbit IgG horseradish  
440 peroxidase (Affinity Biosciences).

441

### 442 **Acknowledgements**

443 We thank the Institutional Center for Shared Technologies and Facilities of  
444 Xishuangbanna Tropical Botanical Garden, CAS for assistance in the  
445 determination of metal contents. We also thank Germplasm Bank of Wild  
446 Species in Southwest China for confocal laser scanning microscopy, and  
447 Crops Conservation and Breeding Base of XTBG for rice planting. This work  
448 was supported by the Applied Basic Research Project of Yunnan Province  
449 (2019FB028 and 202001AT070131).

450

### 451 **Author contributions**

452 GL designed the experiments; FP, CYL, CKL and YL performed the  
453 experiments; FP, CYL, CKL, YL, PX and GL analyzed the data; FP and GL

454 wrote the manuscript; all the authors read and approved the final manuscript.

455

456 **Supplementary data**

457 **Supplemental Figure S1.** Identification of *OsIMA1* overexpression plants.

458 **Supplemental Figure S2.** Generation of *aIMA* overexpression plants.

459 **Supplementary Table S1.** Primers used in this paper.

460

461

462

## References

- Briat JF, Dubos C, Gaymard F.** 2015. Iron nutrition, biomass production, and plant product quality. *Trends in Plant Science* **20**, 33-40.
- Brumbarova T, Bauer P.** 2005. Iron-mediated control of the basic helix-loop-helix protein FER, a regulator of iron uptake in tomato. *Plant Physiology* **137**, 1018-1026.
- Cheng LJ, Wang F, Shou HX, et al.** 2007. Mutation in nicotianamine aminotransferase stimulated the Fe(II) acquisition system and led to iron accumulation in rice. *Plant Physiology* **145**, 1647-1657.
- Eide D, Broderius M, Fett J, Guerinot ML.** 1996. A novel iron-regulated metal transporter from plants identified by functional expression in yeast. *Proceedings of the National Academy of Sciences, USA* **93**, 5624-5628.
- Guo M, Ruan W, Zhang Y, Zhang Y, Wang X, Guo Z, Wang L, Zhou T, Paz-Ares J, Yi K.** 2022. A reciprocal inhibitory module for Pi and iron signaling. *Molecular Plant* **15**, 138-150.
- Grillet L, Lan P, Li W, Mokkalapati G, Schmidt W.** 2018. IRON MAN is a ubiquitous family of peptides that control iron transport in plants. *Nature Plants* **4**, 953-963.
- Häensch R, Mendel R.** 2009. Physiological functions of mineral micronutrients (Cu, Zn, Mn, Fe, Ni, Mo, B, Cl). *Current Opinion in Plant Biology* **12**, 259-266.
- Hirayama T, Lei GJ, Yamaji N, Nakagawa N, Ma JF.** 2018. The putative peptide gene *FEP1* regulates iron deficiency response in *Arabidopsis*. *Plant Cell & Physiology* **59**, 1739-1752.
- Ishimaru Y, Suzuki M, Tsukamoto T et al.** 2006. Rice plants take up iron as a Fe<sup>3+</sup>-phytosiderophore and as Fe<sup>2+</sup>. *The Plant Journal* **45**, 335-346.
- Kobayashi T, Nagasaka S, Senoura T, Itai RN, Nakanishi H, Nishizawa NK.** 2013. Iron-binding haemerythrin RING ubiquitin ligases regulate plant iron responses and accumulation. *Nature Communications* **4**, 2792.
- Kobayashi T.** 2019. Understanding the Complexity of Iron Sensing and

Signaling Cascades in Plants. *Plant Cell & Physiology* **60**, 1440-1446.

**Kobayashi T, Ozu A, Kobayashi S, An G, Jeon JS, Nishizawa NK.** 2019.

Os**H**LH058 and Os**H**LH059 transcription factors positively regulate iron deficiency responses in rice. *Plant Molecular Biology* **101**, 471-486.

**Kobayashi T, Nagano AJ, Nishizawa NK.** 2021. Iron deficiency-inducible

peptide codin genes *Os/MA1* and *Os/MA2* positively regulate a major pathway of iron uptake and translocation in rice. *Journal of Experimental Botany* **72**, 2196-2211.

**Li C, Li Y, Xu P, Liang G.** 2020. Os**I**RO3 negatively regulates Fe homeostasis

by repressing the expression of Os**I**RO2. (under review).

**Li Y, Lu CK, Li CY, Lei RH, Pu MN, Zhao JH, Peng F, Ping HQ, Wang D,**

**Liang G.** 2021. IRON MAN interacts with BRUTUS to maintain iron homeostasis in *Arabidopsis*. *Proceedings of the National Academy of Sciences, USA* **118**, e2109063118.

**Liang G, Zhang H, Li Y, Pu M, Yang Y, Li C, Lu C, Xu P, Yu D.** 2020. *Oryza*

*sativa* Fer-like Fe deficiency-induced transcription factor (Os**F**IT/Os**H**LH156) interacts with Os**I**RO2 to regulate iron homeostasis. *Journal of Integrative Plant Biology* **62**, 668-689.

**Marschner H.** 1995. Mineral nutrition of higher plants, 2nd edn. Academic

Press, London.

**Masuda H, Aung M, Nishizawa N.** 2013. Iron biofortification of rice using

different transgenic approaches. *Rice* **6**, 40.

**Mayer JE, Pfeiffer WH, Beyer P.** 2008. Biofortified crops to alleviate

micronutrient malnutrition. *Current Opinion in Plant Biology* **11**, 166-170.

**Ogo Y, Itai RN, Kobayashi T, Aung MS, Nakanishi H, Nishizawa NK.** 2011.

Os**I**RO2 is responsible for iron utilization in rice and improves growth and yield in calcareous soil. *Plant Molecular Biology* **75**, 593-605.

**Ogo Y, Itai RN, Nakanishi H, Kobayashi T, Takahashi M, Mori S,**

**Nishizawa NK.** 2007. The rice bHLH protein Os**I**RO2 is an essential regulator of the genes involved in Fe uptake under Fe-deficient conditions.

The Plant Journal **51**, 366-377.

- Robinson NJ, Procter CM, Connolly EL, Guerinot ML.** 1999. A ferric-chelate reductase for iron uptake from soils. *Nature* **397**, 694–697.
- Römheld V, Marschner H.** 1986. Evidence for a specific uptake system for iron phytosiderophores in roots of grasses. *Plant Physiology* **80**, 175-180.
- Salahudeen AA, Thompson JW, Ruiz JC, Ma HW, Kinch LN, Li Q, Grishin NV, Bruick RK.** 2009. An E3 ligase possessing an iron-responsive hemerythrin domain is a regulator of iron homeostasis. *Science* **326**, 722-726.
- Selote D, Samira R, Matthiadis A, Gillikin JW, Long TA.** 2015. Iron-binding E3 ligase mediates iron response in plants by targeting basic helix-loop-helix transcription factors. *Plant Physiology* **167**, 273-286.
- Vashisht AA, Zumbrennen KB, Huang X, et al.** 2009. Control of iron homeostasis by an iron-regulated ubiquitin ligase. *Science* **326**, 718-721.
- Wang F, Itai RN, Nozoye T, Kobayashi T, Nishizawa NK, Nakanishi H.** 2020a. The bHLH protein OsIRO3 is critical for plant survival and iron (Fe) homeostasis in rice (*Oryza sativa* L.) under Fe-deficient conditions. *Soil Science and Plant Nutrition* **66**, 579-592.
- Wang W, Ye J, Ma Y, Wang T, Shou H, Zheng L.** 2020b. OsIRO3 Plays an Essential Role in Iron Deficiency Responses and Regulates Iron Homeostasis in Rice. *Plants (Basel)*. **9**, 1095.
- Wang S, Li L, Ying Y, Wang J, Shao JF, Yamaji N, Whelan J, Ma JF, Shou H.** 2019. A transcription factor OsbHLH156 regulates Strategy II iron acquisition through localising IRO2 to the nucleus in rice. *New Phytologist* **225**, 1247-1260.
- Zhang H, Li Y, Pu M, Xu P, Liang G, Yu D.** 2020. *Oryza sativa* POSITIVE REGULATOR OF IRON DEFICIENCY RESPONSE 2 (OsPRI2) and OsPRI3 are involved in the maintenance of Fe homeostasis. *Plant, Cell & Environment* **43**, 261-274.

**Zhang H, Li Y, Yao X, Liang G, Yu D.** 2017. POSITIVE REGULAT OF IRON HOMEOSTASIS1, OsPRI1, facilitates iron homeostasis. *Plant Physiology* **175**, 543–554.

**Zheng L, Ying Y, Wang L, Wang F, Whelan J, Shou H.** 2010. Identification of a novel Fe regulated basic helix-loop-helix protein involved in Fe homeostasis in *Oryza sativa*. *BMC Plant Biology* **10**: 166.

## Figure Legends

### Figure 1. OsIMA1 and OsIMA2 interact with OsHRZ1 and OsHRZ2.

(A) OsIMAs interact with the C-terminal regions of OsHRZs in yeast. The full-length OsIMAs were fused with BD, and the C-terminal regions of OsHRZs with AD. Yeast co-transformed with different BD and AD plasmid combinations was spotted. Growth on selective plates lacking leucine, tryptophan, adenine, and histidine (-4) or lacking leucine and tryptophan (-2) is shown.

(B) Subcellular localization of OsIMA1 and OsIMA2. mCherry was fused with the N-end of OsIMAs. Transient expression assays were performed in *N. benthamiana* leaves.

(C) Interaction of OsIMAs and OsHRZs in plant cells. Tripartite split-sfGFP complementation assays were performed. OsIMAs were fused with GFP10, and OsHRZs with GFP11. The combinations indicated were introduced into *Agrobacterium* and co-expressed in *N. benthamiana* leaves.

### Figure 2. The last amino acid of OsIMA1 and OsIMA2 is crucial for interactions with OsHRZ1 and OsHRZ2.

(A) Alignment of amino acid sequences of OsIMAs. The full-length amino acid sequences of OsIMAs were aligned with Clustal Omega online (<https://www.ebi.ac.uk/Tools/msa/clustalo/>).

(B) Yeast-two-hybrid assays. The truncated or mutated OsIMAs were fused with BD, and the C-terminal regions of OsHRZs with AD. Yeast co-transformed with different BD and AD plasmid combinations was spotted. Growth on selective plates lacking leucine, tryptophan, adenine, and histidine (-4) or lacking leucine and tryptophan (-2) is shown.

### Figure 3. *OsIMA1* overexpressing plants mimic the *hrz1-2* loss-of-function mutant.

(A) Seed setting percentage. Data represent means  $\pm$  standard deviation (SD)

( $n = 3$ ). Different letters above each bar indicate statistically significant differences (ANOVA,  $P < 0.05$ ).

(B) Fe concentration. Brown seeds were used for Fe measurement. Data represent means  $\pm$  standard deviation (SD) ( $n = 3$ ). Different letters above each bar indicate statistically significant differences (ANOVA,  $P < 0.05$ ).

(C) Expression of Fe deficiency inducible genes. Rice plants were grown in Fe sufficient solution for two weeks, and roots were used for RNA extraction and qRT-PCR. Data represent means  $\pm$  standard deviation (SD) ( $n = 3$ ). Different letters above each bar indicate statistically significant differences (ANOVA,  $P < 0.05$ ).

**Figure 4.** Both OsHRZ1 and OsHRZ2 promote the degradation of OsIMA1. mCherry-OsIMA1 or mCherry-OsIMA1 was coexpressed with MYC-GFP, OsHRZ1-GFP, and OsHRZ2-GFP, respectively. Total protein was extracted and immunoblotted with anti-GFP antibody or anti-mCherry antibody. Ponceau staining shows equal loading. Protein molecular weight (in kD) is indicated.

**Figure 5.** The C-terminal region of OsPRIs interacts with OsHRZs.

(A) All four OsPRI proteins interact with both OsHRZ1 and OsHRZ2. The full-length OsPRIs were fused with AD, and the C-terminal regions of OsHRZs with BD. Yeast co-transformed with different BD and AD plasmid combinations was spotted. Growth on selective plates lacking leucine, tryptophan, adenine, and histidine (-4) or lacking leucine and tryptophan (-2) is shown.

(B) The C-terminal regions of bHLH IVc proteins from different plants. bHLH IVc proteins in *Arabidopsis thaliana*, *Oryza sativa*, *Zea mays*, and *Sorghum bicolor*, were used for analysis. AtbHLH34 (AT3G23210), AtbHLH104 (AT4G14410), AtbHLH105 (AT5G54680), AtbHLH115 (AT1G51070), OsPRI1 (LOC\_Os08g04390), OsPRI2 (LOC\_Os05g38140), OsPRI3 (LOC\_Os02g02480), OsPRI4 (LOC\_Os07g35870), ZmIVc-1 (ZmPHJ40.04G070000), ZmIVc-2 (ZmPHJ40.07G193300), ZmIVc-3



(ZmPHJ40.04G350300), ZmIVc-4 (ZmPHJ40.05G151400), ZmIVc-5 (ZmPHJ40.06G183000), SbiIVc-1 (SbiSC187.07G031300), SbiIVc-2(SbiSC187.02G307200), SbiIVc-3(SbiSC187.04G009900), SbiIVc-4 (SbiSC187.09G150000).

(C) The C-terminal region of OsPRI1 interacts with OsHRZ1 and OsHRZ2. The truncated or mutated OsPRI1 were fused with AD, and the C-terminal regions of OsHRZs with BD. Yeast co-transformed with different BD and AD plasmid combinations was spotted. Growth on selective plates lacking leucine, tryptophan, adenine, and histidine (-4) or lacking leucine and tryptophan (-2) is shown.

**Figure 6.** Overexpression of *alMA* causes Fe over-accumulation in seeds.

(A) Degradation of *alMA* by OsHRZs. mCherry-*alMA* was coexpressed with MYC-GFP, OsHRZ1-GFP, and OsHRZ2-GFP, respectively. Total protein was extracted and immunoblotted with anti-GFP antibody or anti-mCherry antibody. Ponceau staining shows equal loading. Protein molecular weight (in kD) is indicated.

(B) Fe concentration. Brown seeds were used for Fe measurement. Data represent means  $\pm$  standard deviation (SD) ( $n = 3$ ). The asterisk indicates a significant difference from the wild type as determined by Student's t Test ( $P < 0.05$ ).

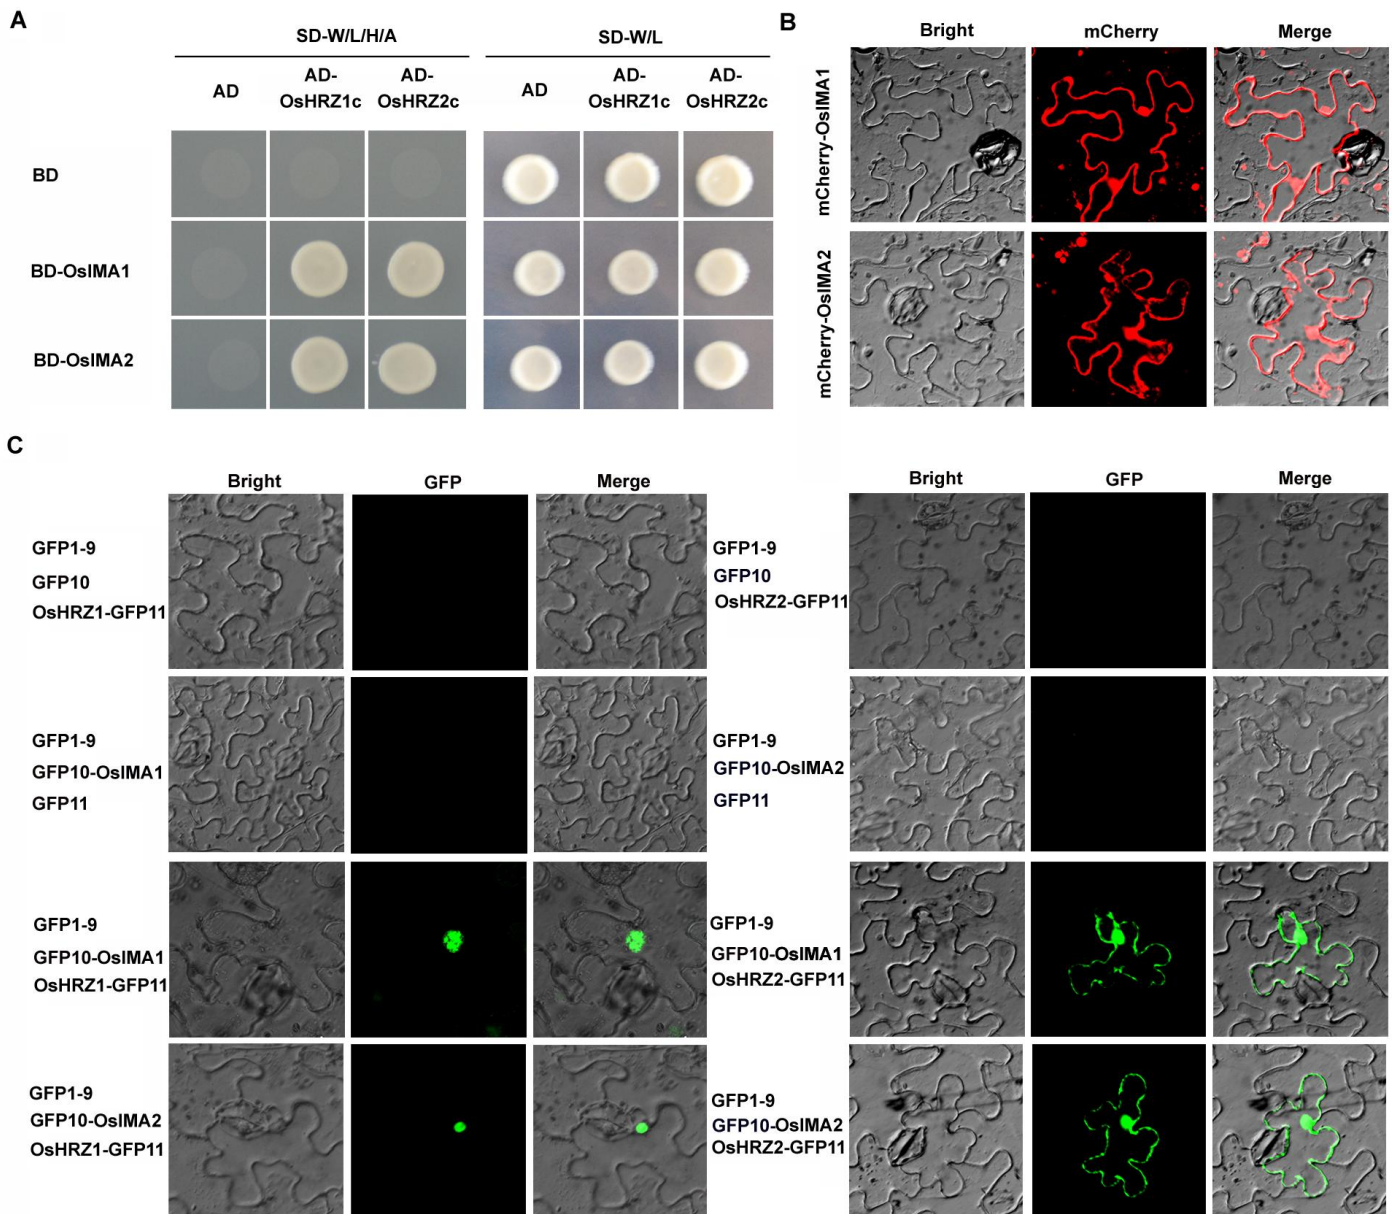

**Figure 1.** OsIMA1 and OsIMA2 interact with OsHRZ1 and OsHRZ2.

(A) OsIMAs interact with the C-terminal regions of OsHRZs in yeast. The full-length OsIMAs were fused with BD, and the C-terminal regions of OsHRZs with AD. Yeast co-transformed with different BD and AD plasmid combinations was spotted. Growth on selective plates lacking leucine, tryptophan, adenine, and histidine (-4) or lacking leucine and tryptophan (-2) is shown.

(B) Subcellular localization of OsIMA1 and OsIMA2. mCherry was fused with the N-end of OsIMAs. Transient expression assays were performed in *N. benthamiana* leaves.

(C) Interaction of OsIMAs and OsHRZs in plant cells. Tripartite split-sfGFP complementation assays were performed. OsIMAs were fused with GFP10, and OsHRZs with GFP11. The combinations indicated were introduced into *Agrobacterium* and co-expressed in *N. benthamiana* leaves.

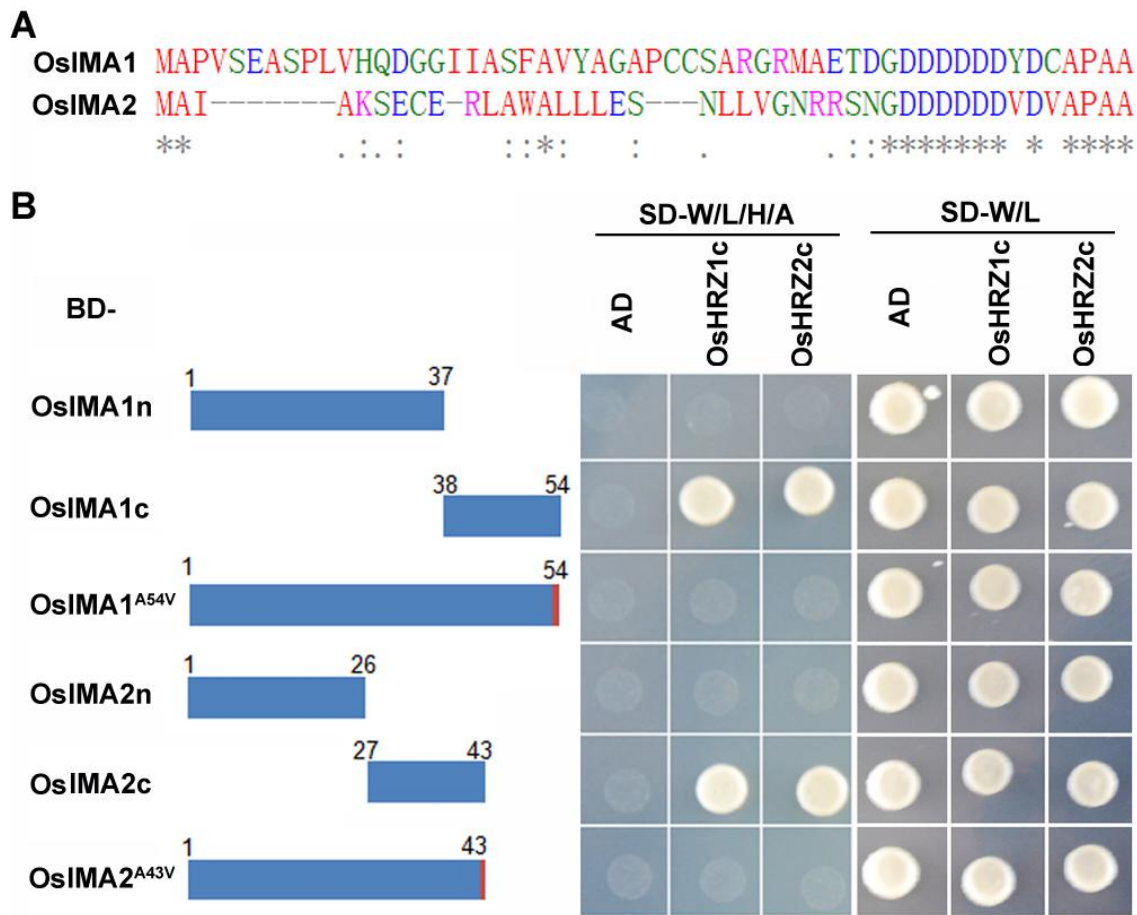

**Figure 2.** The last amino acid of OsIMA1 and OsIMA2 is crucial for interactions with OsHRZ1 and OsHRZ2.

(A) Alignment of amino acid sequences of OsIMAs. The full-length amino acid sequences of OsIMAs were aligned with Clustal Omega online (<https://www.ebi.ac.uk/Tools/msa/clustalo/>).

(B) Yeast-two-hybrid assays. The truncated or mutated OsIMAs were fused with BD, and the C-terminal regions of OsHRZs with AD. Yeast co-transformed with different BD and AD plasmid combinations was spotted. Growth on selective plates lacking leucine, tryptophan, adenine, and histidine (-4) or lacking leucine and tryptophan (-2) is shown.

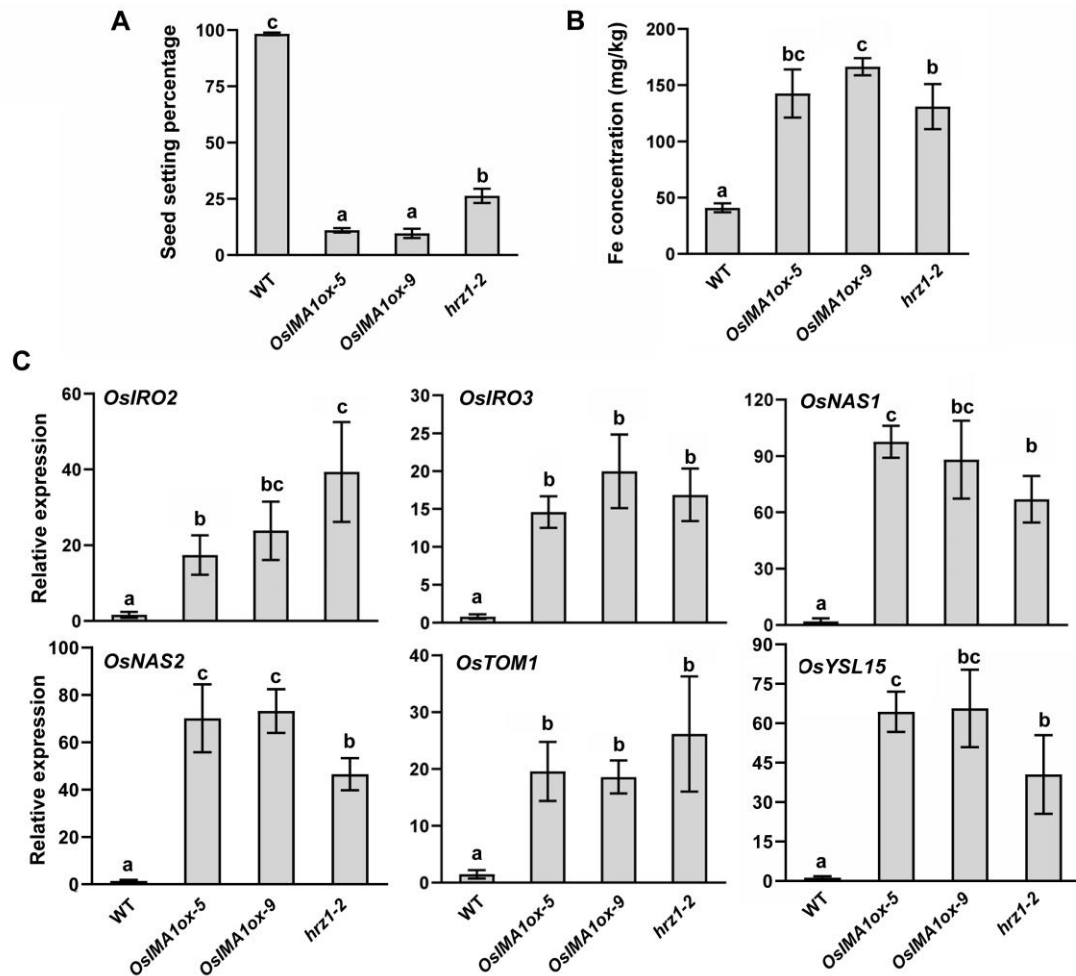

**Figure 3.** *OsIMA1* overexpressing plants mimic the *hrz1-2* loss-of-function mutant.

(A) Seed setting percentage. Data represent means  $\pm$  standard deviation (SD) ( $n = 3$ ). Different letters above each bar indicate statistically significant differences (ANOVA,  $P < 0.05$ ).

(B) Fe concentration. Brown seeds were used for Fe measurement. Data represent means  $\pm$  standard deviation (SD) ( $n = 3$ ). Different letters above each bar indicate statistically significant differences (ANOVA,  $P < 0.05$ ).

(C) Expression of Fe deficiency inducible genes. Rice plants were grown in Fe sufficient solution for two weeks, and roots were used for RNA extraction and qRT-PCR. Data represent means  $\pm$  standard deviation (SD) ( $n = 3$ ). Different letters above each bar indicate statistically significant differences (ANOVA,  $P < 0.05$ ).

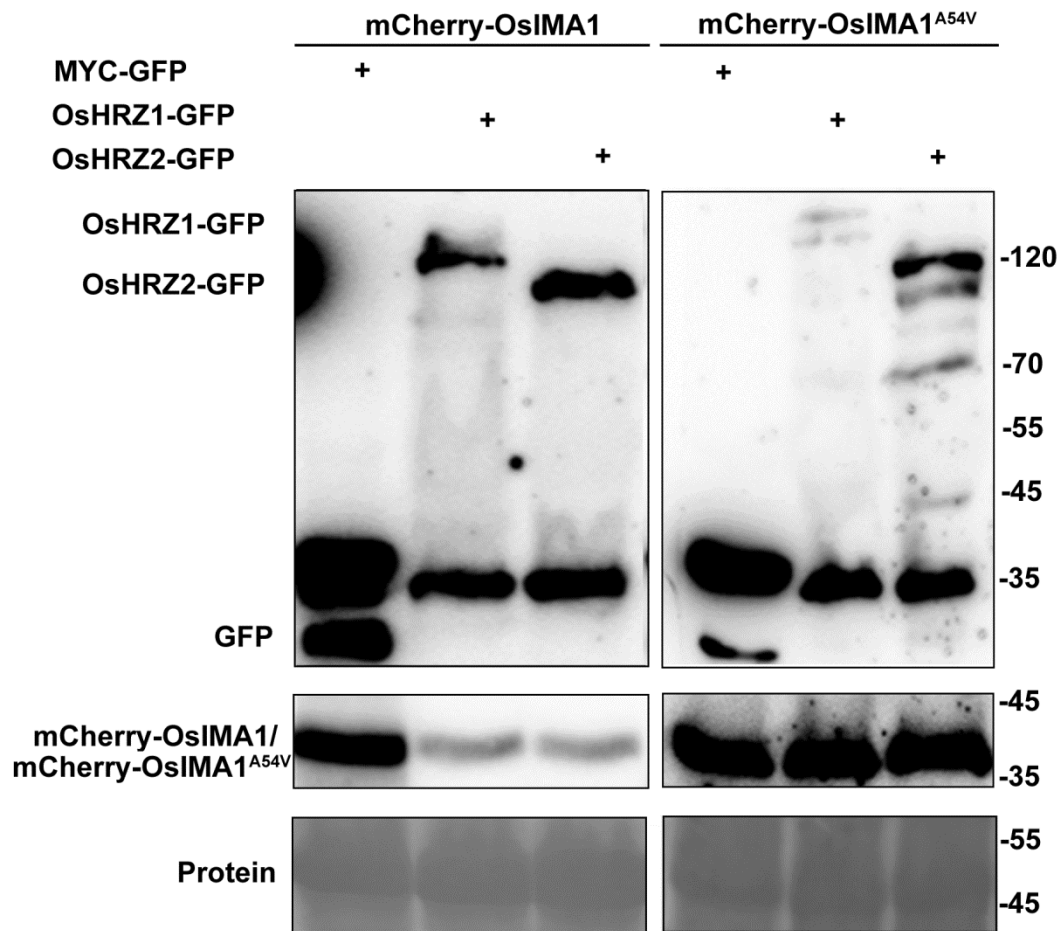

**Figure 4.** Both OsHRZ1 and OsHRZ2 promote the degradation of OsIMA1. mCherry-OsIMA1 or mCherry-OsIMA1<sup>A54V</sup> was coexpressed with MYC-GFP, OsHRZ1-GFP, and OsHRZ2-GFP, respectively. Total protein was extracted and immunoblotted with anti-GFP antibody or anti-mCherry antibody. Ponceau staining shows equal loading. Protein molecular weight (in kD) is indicated.



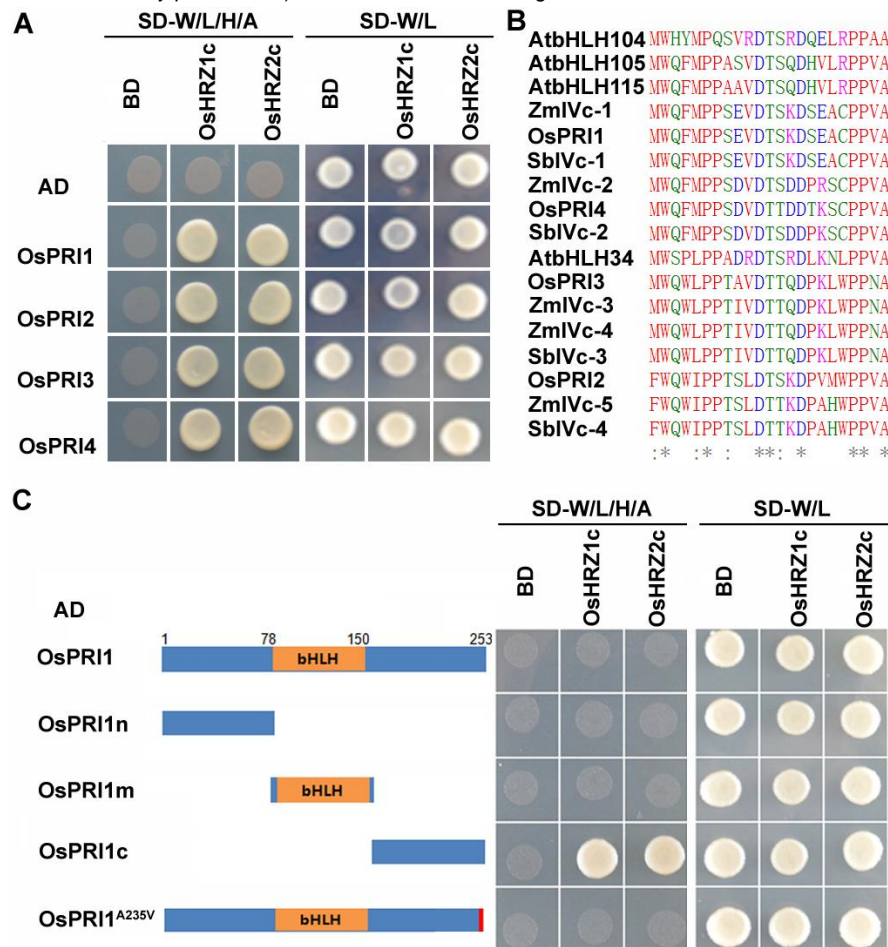

**Figure 5.** The C-terminal region of OsPRIs interacts with OsHRZs.

(A) All four OsPRI proteins interact with both OsHRZ1 and OsHRZ2. The full-length OsPRIs were fused with AD, and the C-terminal regions of OsHRZs with BD. Yeast co-transformed with different BD and AD plasmid combinations was spotted. Growth on selective plates lacking leucine, tryptophan, adenine, and histidine (-4) or lacking leucine and tryptophan (-2) is shown.

(B) The C-terminal regions of bHLH IVc proteins from different plants. bHLH IVc proteins in *Arabidopsis thaliana*, *Oryza sativa*, *Zea mays*, and *Sorghum bicolor*, were used for analysis. AtbHLH34 (AT3G23210), AtbHLH104 (AT4G14410), AtbHLH105 (AT5G54680), AtbHLH115 (AT1G51070), OsPRI1 (LOC\_Os08g04390), OsPRI2 (LOC\_Os05g38140), OsPRI3 (LOC\_Os02g02480), OsPRI4 (LOC\_Os07g35870), ZmIVc-1 (ZmPHJ40.04G070000), ZmIVc-2 (ZmPHJ40.07G193300), ZmIVc-3 (ZmPHJ40.04G350300), ZmIVc-4 (ZmPHJ40.05G151400), ZmIVc-5 (ZmPHJ40.06G183000), SbIVc-1 (SbiSC187.07G031300), SbIVc-2 (SbiSC187.02G307200), SbIVc-3 (SbiSC187.04G009900), SbIVc-4 (SbiSC187.09G150000).

(C) The C-terminal region of OsPRI1 interacts with OsHRZ1 and OsHRZ2. The truncated or mutated OsPRI1 were fused with AD, and the C-terminal regions of OsHRZs with BD. Yeast co-transformed with different BD and AD plasmid combinations was spotted. Growth on selective plates lacking leucine, tryptophan, adenine, and histidine (-4) or lacking leucine and tryptophan (-2) is shown.

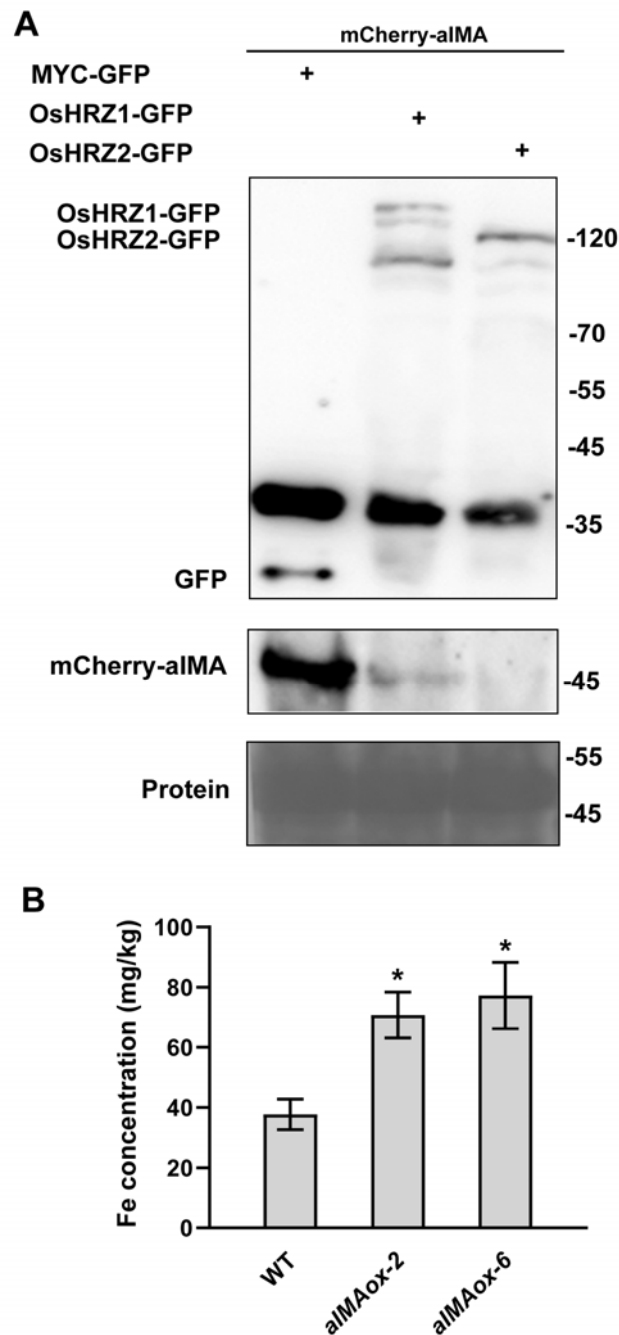

**Figure 6.** Overexpression of *aIMA* causes Fe over-accumulation in seeds.

(A) Degradation of aIMA by OsHRZs. mCherry-aIMA was coexpressed with MYC-GFP, OsHRZ1-GFP, and OsHRZ2-GFP, respectively. Total protein was extracted and immunoblotted with anti-GFP antibody or anti-mCherry antibody. Ponceau staining shows equal loading. Protein molecular weight (in kD) is indicated.

(B) Fe concentration. Brown seeds were used for Fe measurement. Data represent means  $\pm$  standard deviation (SD) ( $n = 3$ ). The asterisk indicates a significant difference from the wild type as determined by Student's t Test ( $P < 0.05$ ).
